# Supplementary material for: PEPstrMOD: structure prediction of peptides containing natural, non-natural and modified residues
Source: PubMed Central journal article supplement (PMC4687368; doi:10.1186/s13062-015-0103-4), 2015-12-21
Supplement: 13062_2015_103_MOESM1_ESM.pdf [file 13062_2015_103_MOESM1_ESM.pdf]

**PEPstrMOD: Structure Prediction of Peptides Containing Natural, Non-natural and Modified Residues.**

Sandeep Singh<sup>1</sup>, Harinder Singh<sup>1</sup>, Abhishek Tuknait<sup>1</sup>, Kumardeep Chaudhary<sup>1</sup>, Balvinder Singh<sup>1</sup>, S Kumaran<sup>2</sup> and Gajendra P.S. Raghava<sup>1\*</sup>

<sup>1</sup>Bioinformatics Centre, CSIR-Institute of Microbial Technology, Chandigarh-160036, India

<sup>2</sup>CSIR-Institute of Microbial Technology, Chandigarh-160036, India

**ADDITIONAL FILE 1: List of modified residues integrated in PEPstrMOD; AMBER and GROMACS parameters for performing Molecular Dynamics.**

TableS1: Types of non-natural amino acids present in FFNCAA and SwissSideChain Force field libraries

| Parent Amino acid | Non-natural modifications present in FFNCAA                                                                                                                                                                                                                                                                                                                                                                                                                                                                                                                                                                                  | Non-natural modifications present in SwissSideChain                                                                                                                                                                                                                                                                                                                                         |
|-------------------|------------------------------------------------------------------------------------------------------------------------------------------------------------------------------------------------------------------------------------------------------------------------------------------------------------------------------------------------------------------------------------------------------------------------------------------------------------------------------------------------------------------------------------------------------------------------------------------------------------------------------|---------------------------------------------------------------------------------------------------------------------------------------------------------------------------------------------------------------------------------------------------------------------------------------------------------------------------------------------------------------------------------------------|
| ALA               | 3-cyclopentylalanine, diethylalanine, Cyclohexylalanine, 1-naphthylalanine, 2-naphthylalanine, 5-hydroxy-1-naphthylalanine, 6-hydroxy-2-naphthylalanine, 3-(9-anthryl)-alanine, 3-(2-pyridyl)-alanine, 3-(3-pyridyl)-alanine, 3-(4-pyridyl)-alanine, 3-(2-quinolyl)-alanine, 3-(3-quinolyl)-alanine, 3-(4-quinolyl)-alanine, 3-(5-quinolyl)-alanine, 3-(6-quinolyl)-alanine, 3-(8-hydroxyquinolin-3-yl)-alanine, N-methylalanine, 1-pyrenylalanine, (R)-alpha-ethylalanine, (S)-alpha-ethylalanine, R(+)-alpha-Allylalanine, (R)-2,(2'-propenyl)alanine, (R)-2,(4'-pentenyl)alanine, (R)-2,(7'-octenyl)alanine, beta-alanine | 3-(4H-thieno[3,2-b]pyrrol-6-yl)-L-alanine, 3-cyclohexyl-alanine, m-amidinophenyl-3-alanine, azido-alanine, 3-(3-benzothienyl)-alanine, 3-chloro-l-alanine, 3-Cyclopentyl-alanine, 3,3-dihydroxy-alanine, Trifluoro-alanine, (2-furyl)-alanine, Styrylalanine, 3-(2-Tetrazolyl)-alanine, 3-(3-thienyl)-alanine, 3-(2-thienyl)-alanine, 3-(1,2,4-Triazol-1-yl)-alanine, (4-thiazolyl)-alanine |
| CYS               | (R)-L-alpha-methylcysteine, cysteine acetamide, N-methylcysteine, carboxymethylated cysteine, benzyl cysteine, (S)-(2-hydroxyethyl)-cysteine, (S)-acetyl-cysteine, beta-cysteine                                                                                                                                                                                                                                                                                                                                                                                                                                             | s-(difluoromethyl)-homocysteine, Selenocysteine, homocysteine                                                                                                                                                                                                                                                                                                                               |
| ASP               | N-methylaspartic acid, 3-methyl-aspartic acid, beta-aspartic-acid                                                                                                                                                                                                                                                                                                                                                                                                                                                                                                                                                            | beta-hydroxyaspartic acid, 3,3-dimethyl aspartic acid                                                                                                                                                                                                                                                                                                                                       |

|     |                                                                                                                                                                                                                                                                                                                                                                                  |                                                                                                                                                                                                                                                                                                                                                                                                                                                                                                                                                                                          |
|-----|----------------------------------------------------------------------------------------------------------------------------------------------------------------------------------------------------------------------------------------------------------------------------------------------------------------------------------------------------------------------------------|------------------------------------------------------------------------------------------------------------------------------------------------------------------------------------------------------------------------------------------------------------------------------------------------------------------------------------------------------------------------------------------------------------------------------------------------------------------------------------------------------------------------------------------------------------------------------------------|
| GLU | 5-o-methyl-glutamic acid, (2S,4R)-4-methylglutamate, N-methyl-glutamic acid, (3R)-3-methyl-glutamic acid, (3S)-3-methyl-glutamic acid                                                                                                                                                                                                                                            | 4-hydroxy-glutamic-acid, 4-Fluoro-glutamic acid                                                                                                                                                                                                                                                                                                                                                                                                                                                                                                                                          |
| PHE | alpha-methyl-l-phenylalanine, 2-ethyl,4-o-methyl-biphenylalanine, 3-methyl-biphenylalanine, 3-o-methyl-biphenylalanine, 2-ethyl-biphenylalanine, 2-methyl-4-o-methyl-biphenylalanine, 2-methyl-biphenylalanine, biphenylalanine, 2-methylphenylalanine, 3-methylphenylalanine, 4-methylphenylalanine, 4-tert-butyl-phenylalanine, 4-amino-phenylalanine, 4-methoxy-phenylalanine | 4-carbamimidoyl-l-phenylalanine, 3-cyano-phenylalanine, 4-Bromo-phenylalanine, 4-cyano-phenylalanine, 4-hydroxymethyl-phenylalanine, 4,4-biphenylalanine, 2-cyano-phenylalanine, 2,4-dichloro-phenylalanine, 3,4-dichloro-phenylalanine, 3,4-Dihydroxy-phenylalanine, 3,3-diphenylalanine, 3-ethyl-phenylalanine, 3,4-Difluoro-phenylalanine, 3,4-Dimethyl-phenylalanine, 4-benzoyl-phenylalanine, pentafluoro-phenylalanine, 4-Nitro-phenylalanine, 2-(Trifluoromethyl)-phenylalanine, 3-(Trifluoromethyl)-phenylalanine, 4-(Trifluoromethyl)-phenylalanine, 3,5-Difluoro-phenylalanine |
| GLY | (2-indanyl)-glycine, vinylglycine, phenylglycine, 4-hydroxyphenylglycine, N-methylglycine, 2-allyl-glycine, beta-glycine                                                                                                                                                                                                                                                         | Cyclohexylglycine, 3-chloro-4-hydroxy-phenylglycine, 2-Chloro-phenylglycine, 3-Chloro-phenylglycine, 4-Chloro-phenylglycine, 2-Fluoro-phenylglycine, 3-Fluoro-phenylglycine, 4-Fluoro-phenylglycine, 2-(Trifluoromethyl)-phenylglycine, 3-(Trifluoromethyl)-phenylglycine, 4-(Trifluoromethyl)-phenylglycine, 2-thienylglycine, 3-thienylglycine                                                                                                                                                                                                                                         |
| HIS | N-methyl-histidine                                                                                                                                                                                                                                                                                                                                                               |                                                                                                                                                                                                                                                                                                                                                                                                                                                                                                                                                                                          |
| ILE | N-methylisoleucine, allo-isoleucine, 3-methyl-alloisoleucine, beta-isoleucine                                                                                                                                                                                                                                                                                                    | 5-bromo-l-isoleucine, 4-Hydroxy-L-isoleucine, 3-methyl-l-alloisoleucine, 4,5-dihydroxy-isoleucine                                                                                                                                                                                                                                                                                                                                                                                                                                                                                        |
| LYS | N-methyl-lysine, beta-lysine                                                                                                                                                                                                                                                                                                                                                     | beta-lysine, 6-carboxylsine, thialysine                                                                                                                                                                                                                                                                                                                                                                                                                                                                                                                                                  |

|        |                                                                                                                                                                                                               |                                                                                                                                                                                                                                  |
|--------|---------------------------------------------------------------------------------------------------------------------------------------------------------------------------------------------------------------|----------------------------------------------------------------------------------------------------------------------------------------------------------------------------------------------------------------------------------|
| LEU    | N-methyl-leucine, homoleucine, 6-hydroxy-norleucine, norleucine, (R)-alpha-methylleucine, (tert-butyl)leucine, beta-hydroxy-leucine                                                                           | (4r)-5-oxo-l-leucine, Tertleucine, (4s)-5-fluoro-l-leucine, 5-oxo-l-norleucine, 5,5,5-Trifluoro-leucine                                                                                                                          |
| MET    | hydroxyl-methionine, ethionine, N-methyl-methionine, beta-methionine                                                                                                                                          | nitrilo-l-methionine, 3,3-dimethyl-methionine sulfoxide, s-oxymethionine                                                                                                                                                         |
| ASN    | N4-methyl-asparagine, N-methyl asparagine                                                                                                                                                                     | beta-hydroxyasparagine                                                                                                                                                                                                           |
| PRO    | NA                                                                                                                                                                                                            | NA                                                                                                                                                                                                                               |
| GLN    | N-methylglutamine, N5-methyl-glutamine, glutamine hydroxamate, 3-methyl glutamine, beta-glutamine                                                                                                             | NA                                                                                                                                                                                                                               |
| ARG    | N-methyl-arginine                                                                                                                                                                                             | 5-methyl-arginine, c-gamma-hydroxy arginine, homoarginine                                                                                                                                                                        |
| SER    | Homoserine, N-methyl-serine, beta-serine                                                                                                                                                                      | Phenylserine, o-acetylserine, phosphoserine, phosphoserine(charge:-2),                                                                                                                                                           |
| THR    | o-methyl-threonine, beta-threonine                                                                                                                                                                            | Allo-threonine, 4-chloro-threonine, 4-hydroxy-l-threonine, phosphothreonine, phosphothreonine(charge:-2)                                                                                                                         |
| VAL    | (R)-(+)-alpha-methylvaline, norvaline, N-methyl-valine, hydroxynorvaline, beta-valine                                                                                                                         | 3-Fluoro-valine, 3-hydroxy-l-valine, 4-oxo-l-valine                                                                                                                                                                              |
| TRP    | 5-methyltryptophan, 1-methyltryptophan, N-methyltryptophan, 2-hydroxy-tryptophan, 4-amino-tryptophan, 6-methyltryptophan, 5-methoxytryptophan, beta-hydroxy-tryptophane, 5-hydroxytryptophan, beta-tryptophan | 4-fluoro-tryptophan, 4-hydroxy-tryptophan, 6-chloro-l-tryptophan, 6-bromo-tryptophan, 7-chloro-tryptophan, 6-fluoro-l-tryptophan, 5-Fluoro-tryptophan, 5-Methyl-tryptophan, 6-hydroxy-tryptophan, 6-amino-7-hydroxy-l-tryptophan |
| TYR    | O-methyltyrosine, O-ethyltyrosine, O-allyltyrosine, N-methyltyrosine, o-tyrosine, 3-amino-tyrosine, 3-amino-6-tyrosine, (beta)-beta-hydroxy-tyrosine, beta-tyrosine                                           | 3-Chloro-tyrosine, 3,5-dibromotyrosine, 3-iodo-tyrosine, meta-nitro-tyrosine, (beta)-3-chloro-beta-hydroxy-l-tyrosine, phosphotyrosine, phosphotyrosine(charge:-2), 3-Amino-L-tyrosine, 3,5-diiodotyrosine, 3-fluorotyrosine     |
| Others | Alpha-aminobutyric acid, 2-aminobutyric acid, adamantane, 2-                                                                                                                                                  | 2-amino-6-oxopimelic acid, 1-2-amino-6-                                                                                                                                                                                          |

|  |                                                                                                                                                                                                                                                                                                                                                                                                           |                                                                                                                                                                                                                                                                                                                                                                                                                                   |
|--|-----------------------------------------------------------------------------------------------------------------------------------------------------------------------------------------------------------------------------------------------------------------------------------------------------------------------------------------------------------------------------------------------------------|-----------------------------------------------------------------------------------------------------------------------------------------------------------------------------------------------------------------------------------------------------------------------------------------------------------------------------------------------------------------------------------------------------------------------------------|
|  | aminoheptanoic acid, (2s,4s)-2,5-diamino-4-hydroxy-5-oxopentanoic acid, 2-amino-propanedioic acid, 2-amino-6-oxopimelic acid, (2S)-amino(3,5-dihydroxyphenyl)-ethanoic acid, kynurenine, (R)-alpha-methylornithine, (S)-alpha-methylornithine, 2,3-diaminopropanoic acid, diaminobutyric acid, (2S)-2,8-diaminooctanoic acid, ethionine, 2-amino-5-hydroxypentanoic acid, 6-hydroxy-norleucine, Ornithine | methylene-pimelic acid, cis-amcilenomycin, (2r)-2-amino-4-oxobutanoic acid, canaline, Citrulline, 2-Amino-4-guanidinobutyric acid, 2-Amino-3-guanidinopropionic acid, Canavanine, (2s,3r)-2-amino-3-hydroxy-4-methylpentanoic acid, alpha-amino-2-indanacetic acid, Penicillamine, 5-hydroxy-1-naphthalene, 6-hydroxy-2-naphthalene, o-acetylserine, (2s)-2-amino-4,4-difluorobutanoic acid, Thio-citrulline, 2-Amino adipic acid |
|--|-----------------------------------------------------------------------------------------------------------------------------------------------------------------------------------------------------------------------------------------------------------------------------------------------------------------------------------------------------------------------------------------------------------|-----------------------------------------------------------------------------------------------------------------------------------------------------------------------------------------------------------------------------------------------------------------------------------------------------------------------------------------------------------------------------------------------------------------------------------|

TableS2: Types of PTMs available in FFPTM force field library.

| Parent Amino Acid | PTMs present in FFPTM                                                                                                                                          |
|-------------------|----------------------------------------------------------------------------------------------------------------------------------------------------------------|
| ALA               | NA                                                                                                                                                             |
| CYS               | Cysteinepersulfide, Cysteine sulfenic acid, Phosphocysteine (neutral), S-farnesylcysteine, S-geranylgeranylcysteine, S-palmitoylcysteine                       |
| ASP               | NA                                                                                                                                                             |
| GLU               | 1-Carboxyglutamic Acid (neutral)                                                                                                                               |
| PHE               | Dihydroxyphenylalanine                                                                                                                                         |
| GLY               | NA                                                                                                                                                             |
| HIS               | NA                                                                                                                                                             |
| ILE               | NA                                                                                                                                                             |
| LYS               | 5-hydroxylysine, epsilon-N-methyllysine, N-epsilon-acetyllysine, N6N6-dimethyllysine, N6N6N6-trimethyllysine, Pyrrolysine, N6propanoyllysine, N6butanoyllysine |
| LEU               | N-methyl-leucine, homoleucine, (R)-alpha-methylleucine, beta-hydroxyleucine                                                                                    |
| MET               | hydroxyl-methionine, ethionine, N-methyl-methionine, beta-methionine                                                                                           |

|        |                                                           |
|--------|-----------------------------------------------------------|
| ASN    | NA                                                        |
| PRO    | 3,4-hydroxyproline, 3-hydroxyproline, 4-hydroxyproline    |
| GLN    | NA                                                        |
| ARG    | Dimethylarginine (Anti-symmetric), (omega)-methylarginine |
| SER    | Phosphoserine (neutral), Phosphoserine (-2 charge)        |
| THR    | Phosphothreonine (neutral), Phosphothreonine (-2 charge)  |
| VAL    | NA                                                        |
| TRP    | 7-hydroxytryptophan, 5-hydroxytryptophan                  |
| TRY    | Phosphotyrosine (neutral), Phosphotyrosine (-2 charge)    |
| Others | Ornithine                                                 |

Table S3. AMBER parameters for performing energy minimization and molecular dynamics using AMBER11.

| <b>Vacuum Environment</b>                  |                        |                                                                                                                                                                                 |
|--------------------------------------------|------------------------|---------------------------------------------------------------------------------------------------------------------------------------------------------------------------------|
| Energy Minimization                        |                        | imin=1, ntmin=1, maxcyc=2000, ncyc=1000, ntb=0, igb=0, cut=10.0                                                                                                                 |
| Molecular Dynamics (MD)                    | Heating                | imin=0, irest=0, ntx=1, ntb=0, ntc=2, ntf=2, cut=10.0, igb=0, tempi=0, temp0=300, ntt=3, gamma_ln=2, nstlim=50000, dt=.001, ig=-1, ntp=100, ntwx=100                            |
|                                            | Production MD          | imin=0, irest=0, ntx=5, ntb=0, ntc=2, ntf=2, cut=10.0, igb=0, tempi=300, temp0=300, ntt=3, gamma_ln=2, nstlim=100000, dt=.001, ig=-1, ntp=100, ntwx=100                         |
| <b>Hydrophilic/Hydrophobic Environment</b> |                        |                                                                                                                                                                                 |
| Energy Minimization                        |                        | imin=1, maxcyc=2000, ntmin=1, ncyc=1000, ntb=1, cut=10.0                                                                                                                        |
| Molecular Dynamics                         | Heating (NVT) ensemble | imin=0, irest=0, ntx=1, ntb=1, ntc=2, ntf=2, cut=10.0, tempi=0, temp0=300, ntt=3, gamma_ln=2, nstlim=50000, dt=.001, ig=-1, ntp=100, ntwx=100                                   |
|                                            | NPT ensemble           | imin=0, irest=1, ntx=5, ntr=0, ntb=2, taup=2, pres0=1, ntp=1, ntc=2, ntf=2, cut=10.0, tempi=300, temp0=300, ntt=3, gamma_ln=2, nstlim=50000, dt=.001, ig=-1, ntp=100, ntwx=100  |
|                                            | Production MD          | imin=0, irest=1, ntx=5, ntr=0, ntb=2, taup=2, pres0=1, ntp=1, ntc=2, ntf=2, cut=10.0, tempi=300, temp0=300, ntt=3, gamma_ln=2, nstlim=100000, dt=.001, ig=-1, ntp=100, ntwx=100 |

Table S4. GROMACS parameters for performing energy minimization and molecular dynamics using GROMACS-4.6.5.

| <b>Vacuum Environment</b>                  |                        |                                                                                                                                                                                                                                                                                                                                                                                                                                                                         |
|--------------------------------------------|------------------------|-------------------------------------------------------------------------------------------------------------------------------------------------------------------------------------------------------------------------------------------------------------------------------------------------------------------------------------------------------------------------------------------------------------------------------------------------------------------------|
| Energy Minimization                        |                        | integrator=cg, emtol=100.0, emstep=0.01, nsteps=2000, nstcgsteep=1000, pbc=no                                                                                                                                                                                                                                                                                                                                                                                           |
| Molecular Dynamics (MD)                    | Heating                | integrator=md, nsteps=50000, dt=0.001, nstxout=500, nstvout=500, nstenergy=500, nstxtcout=500, nstlog=500, energygrps=Protein, continuation=no, constraint_algorithm=lincs, constraints=h-bonds, vdwtpe=Cut-off, nstlist=0, ns_type=simple, pbc=no, rlist=0.0, rlistlong=0.0, coulombtype=Cut-off, rcoulomb-switch=0, rcoulomb=0.0, rvdw=0.0, rvdw-switch=0.0, tcoupl=V-rescale, tc-grps=Protein, tau_t=0.1, ref_t=300, pcoupl=no, gen_vel=yes, gen_temp=0, gen_seed=-1 |
|                                            | Production MD          | integrator=md, nsteps=100000, dt=0.001, nstxout=500, nstvout=500, nstenergy=500, nstxtcout=500, nstlog=500, energygrps=Protein, continuation=no, constraint_algorithm=lincs, constraints=h-bonds, vdw-type=Cut-off, nstlist=0, ns_type=simple, pbc=no, rlist=0.0, rlistlong=0.0, coulombtype=cut-off, rcoulomb-switch=0, rcoulomb=0.0, rvdw=0.0, rvdw-switch=0.0, tcoupl=V-rescale, tc-grps=Protein, tau_t=0.1, ref_t=300, pcoupl=no, gen_vel=no                        |
| <b>Hydrophilic/Hydrophobic Environment</b> |                        |                                                                                                                                                                                                                                                                                                                                                                                                                                                                         |
| Energy Minimization                        |                        | integrator=cg, emtol=100.0, emstep=0.01, nsteps=2000, nstcgsteep=1000 nstlist=1, ns_type=grid, coulombtype=PME                                                                                                                                                                                                                                                                                                                                                          |
| Molecular Dynamics                         | Heating (NVT) ensemble | integrator=md, nsteps=50000, dt=0.001, nstxout=100, nstvout=100, nstenergy=100, nstlog=100, continuation=no, constraint_algorithm=lincs, constraints=h-bonds, ns_type=grid, nstlist=10, coulombtype=PME, tcoupl=V-rescale, tc-grps=Protein Non-Protein, tau_t=0.1 0.1, ref_t=300 300, pcoupl=no, pbc=xyz, DispCorr=EnerPres, gen_vel=yes, gen_temp=0, gen_seed=-1                                                                                                       |
|                                            | NPT ensemble           | integrator=md, nsteps=50000, dt=0.001, nstxout=100, nstvout=100, nstenergy=100, nstlog=100, continuation=yes, constraint_algorithm=lincs, constraints=h-bonds, ns_type=grid, nstlist=10, coulombtype=PME, tcoupl=V-rescale, tc-grps=Protein Non-Protein, tau_t=0.1 0.1, ref_t=300 300, pcoupl=Parrinello-Rahman, pcoupltype=isotropic, tau_p=2.0, ref_p=1.0, compressibility=4.5e-5, refcoord_scaling=com, pbc=xyz, DispCorr=EnerPres, gen_vel=no                       |
|                                            | Production MD          | integrator=md, nsteps=100000, dt=0.001, nstxout=500, nstvout=500, nstxtcout=500, nstenergy=500, nstlog=500, continuation=yes, constraint_algorithm=lincs, constraints =h-bonds, ns_type=grid, nstlist=10, coulombtype=PME, tcoupl=V-rescale, tc-grps=Protein                                                                                                                                                                                                            |

|  |  |                                                                                                                                                                                       |
|--|--|---------------------------------------------------------------------------------------------------------------------------------------------------------------------------------------|
|  |  | Non-Protein, tau_t=0.1 0.1, ref_t=300 300, pcoupl=Parrinello-Rahman,<br>pcoupltype=isotropic, tau_p=2.0, ref_p=1.0, compressibility=4.5e-5, pbc=xyz,<br>DispCorr=EnerPres, gen_vel=no |
|--|--|---------------------------------------------------------------------------------------------------------------------------------------------------------------------------------------|
